# Supplementary material for: Longitudinal survey data for diversifying temporal dynamics in flood risk modelling
Source: Copernicus journal article supplement (doi:10.5194/nhess-2021-88), 2021-03-31
Supplement: Supplementary file 1 [file nhess-2021-88-supplement.zip]

## English translation of the survey form used to conduct the study

### FEELING OF SAFETY

#### 1. How long have you been living in Negrar?

1. From birth (*jump to question nr. 3*)
2. From \_\_\_\_\_ (yyyy)

#### 2. If you haven't always lived here, where did you live before?

1. Another municipality in the same region (specify \_\_\_\_\_)
2. Somewhere else in Italy (specify \_\_\_\_\_)
3. Somewhere else abroad (specify \_\_\_\_\_)
4. Another *frazione* in the same municipality

#### 3. [On a scale from 1 (min) to 5 (max)] To what extent living in Negrar make you feel safe?

| Minimum safety |   |   |   |   | Maximum safety | I don't know |
|----------------|---|---|---|---|----------------|--------------|
| 1              | 2 | 3 | 4 | 5 |                | 0            |

#### 4. [On a scale from 1 (min) to 5 (max)] In the following list, could you indicate to what extent each of these events could pose a threat for you or your household?

|                  | Not at all |   |   |   | Severe threat | I don't know |
|------------------|------------|---|---|---|---------------|--------------|
| 1. Earthquake    | 1          | 2 | 3 | 4 | 5             | 0            |
| 2. Terror attack | 1          | 2 | 3 | 4 | 5             | 0            |
| 3. Robbery       | 1          | 2 | 3 | 4 | 5             | 0            |
| 4. Drought       | 1          | 2 | 3 | 4 | 5             | 0            |
| 5. Fire          | 1          | 2 | 3 | 4 | 5             | 0            |

### RISK ASSESSMENT

#### 5. [On a scale from 1 (min) to 5 (max)] Considering floods, to what extent do you think they pose a threat to

|                        | Not at all |   |   |   | Severe threat | I don't know |
|------------------------|------------|---|---|---|---------------|--------------|
| 1. Your home           | 1          | 2 | 3 | 4 | 5             | 0            |
| 2. You personally      | 1          | 2 | 3 | 4 | 5             | 0            |
| 3. The town as a whole | 1          | 2 | 3 | 4 | 5             | 0            |

#### 6. [On a scale from 1 (min) to 5 (max)] How much damage do you think a potential future flood could cause to your home?

| No damage |   |   |   |   | Severe damage | I don't know |
|-----------|---|---|---|---|---------------|--------------|
| 1         | 2 | 3 | 4 | 5 |               | 0            |

7. [On a scale from 1 (min) to 5 (max)] **How did your flood risk awareness change, compared to one year ago?**

|           |   |   |           |   |           |              |
|-----------|---|---|-----------|---|-----------|--------------|
| Decreased |   |   | Unchanged |   | Increased | I don't know |
| 1         | 2 | 3 | 4         | 5 |           | 0            |

#### PERSONAL EXPERIENCE

8. **Have you ever been involved, in the past, in floods or similar events here or elsewhere?**

1. Yes, in |\_\_|\_\_|\_\_|\_\_| in (location) \_\_\_\_\_
2. No

9. **In September 2018 a flood hit Negrar. Were you here when the event occurred?**

1. Yes
2. No (because \_\_\_\_\_)

10. (Only if already residing in Negrar in September 2018) [On a scale from 1 (min) to 5 (max)] **Please assess the severity of the damage suffered by you or your home following the 2018 event:**

|           |   |   |   |   |               |              |
|-----------|---|---|---|---|---------------|--------------|
| No damage |   |   |   |   | Severe damage | I don't know |
| 1         | 2 | 3 | 4 | 5 |               | 0            |

11. **If you suffered damages, what kind?**

\_\_\_\_\_

12. **Did you think something like this could occur here, before the 2018 event?**

1. Yes
2. No
3. I don't know

13. **Do you think a similar event could occur again here in the future?**

1. Yes (because \_\_\_\_\_)
2. No (because \_\_\_\_\_)
3. I don't know

#### INDIVIDUAL PREPAREDNESS

14. [On a scale from 1 (min) to 5 (max)] **To what extent do you feel prepared to face a flood event, should it occur again?**

|                     |   |   |   |   |                 |              |
|---------------------|---|---|---|---|-----------------|--------------|
| Not at all prepared |   |   |   |   | Highly prepared | I don't know |
| 1                   | 2 | 3 | 4 | 5 |                 | 0            |

**15. [On a scale from 1 (min) to 5 (max)] How did your preparedness to face a flood event changed, compared to one year ago?**

|           |   |   |           |   |           |              |
|-----------|---|---|-----------|---|-----------|--------------|
| Decreased |   |   | Unchanged |   | Increased | I don't know |
| 1         | 2 | 3 | 4         | 5 |           | 0            |

**16. Did you adopt any structural protection measure (e.g. movable bulkheads, valves, etc.) for your household?** *[In case they adopted them before and after, cross 1 and write a note on the side]*

1. Yes, before the 2018 event (which? \_\_\_\_\_)
2. Yes, after the 2018 event (which? \_\_\_\_\_)
3. No

**17. (Only if they replied "No" to question nr 16) Why didn't you adopted any structural protection measure to protect your household from floods?** [max 2 answers]

1. I don't need them/I live in a safe area
2. I didn't know about them
3. I was interesred, but they are too expensive
4. These events are rare so it would be more a cost than a benefit
5. I don't know who to contact to install them
6. Protection from natural hazards is the local authorities' responsibility
7. I'm not interested
8. Other

**18. (Only if they replied "No" to question 16) Do you intend to adopt any in the future?**

1. Yes
2. No
3. I don't know

**19. (Only if they replied "Yes" to question nr 16 or "Yes" to nr 18) Which was/is the main reason you wan to adopt structural protection measures?**

1. Because it was recommended by friends, relatives, or the local administration
2. Because I fear the occurrence of a flood
3. Because I fear damages to my household
4. Other (specify \_\_\_\_\_)

**20. (Only if they replied "Yes" to question nr 16 or "Yes" to nr 18) [On a scale from 1 (min) to 5 (max)] Concerning structural protection measures:**

|                                                                     |                      |   |   |   |                |              |
|---------------------------------------------------------------------|----------------------|---|---|---|----------------|--------------|
|                                                                     | Not at all effective |   |   |   | Very effective | I don't know |
| How effective do you think they are in reducing damage from floods? | 1                    | 2 | 3 | 4 | 5              | 0            |

|                               |          |   |   |   |           |              |
|-------------------------------|----------|---|---|---|-----------|--------------|
|                               | Very low |   |   |   | Very high | I don't know |
| How do you assess their cost? | 1        | 2 | 3 | 4 | 5         | 0            |

**21. Did you insure your house against floods?**

1. Yes, before the 2018 event
2. Yes, after the 2018 event
3. No
4. I don't know

**22. (Only if they replied "No" to question nr 21) Why didn't you insure your house against floods? [max 2 answers]**

1. I don't need it/I live in a safe area
2. I didn't know about it
3. I was interested, but it's too expensive
4. These events are rare so it would be more a cost than a benefit
5. It is not my responsibility, but the landlord's
6. Protection from natural hazards is the local authorities' responsibility
7. I'm not interested
8. Other

**23. (Only if they replied "No" to question nr 21) Do you intend to insure your house in the future?**

1. Yes
2. No
3. I don't know

**24. (Only if they replied "Yes" to question nr 21 or "Yes" to nr 23) Why do you intend to insure your house against floods?**

1. Because it was recommended by friends, relatives, or the local administration
2. Because I fear the occurrence of a flood
3. Because I fear damages to my household
4. Other (specify \_\_\_\_\_)

**25. [On a scale from 1 (min) to 5 (max)] Concerning insurance:**

|                                                                  | Not at all effective |   |   |   | Very effective | I don't know |
|------------------------------------------------------------------|----------------------|---|---|---|----------------|--------------|
|                                                                  | 1                    | 2 | 3 | 4 | 5              | 0            |
| How effective do you think it is in reducing damage from floods? |                      |   |   |   |                |              |

|                             | Very low |   |   |   | Very high | I don't know |
|-----------------------------|----------|---|---|---|-----------|--------------|
|                             | 1        | 2 | 3 | 4 | 5         | 0            |
| How do you assess its cost? |          |   |   |   |           |              |

**26. there are various measures to reduce and prevent damage caused by floods. According to you, what are the most urgent ones to adopt here in Negrar? [max 2 answer]**

1. Building new structural protection works
2. A better maintenance of the local streams

3. A different land management (specify \_\_\_\_\_)
4. Improve early warning systems
5. Improve the preparedness of people living in the town
6. Other (specify \_\_\_\_\_)

## STRUCTURAL PROTECTION WORKS

### 27. Do you know any structural protection works in this area, aimed at reducing flood risk?

1. Yes (which? \_\_\_\_\_)
2. No

### 28. Do you know about this structural protection works? *[show picture of construction site]*

1. Yes
2. No (*jump to question nr. 30*)

### 29. (Only if they replied "Yes" to question nr 28) How did you come to know it?

1. On my own
2. Via friends or relatives
3. Via the local administration
4. Via newspapers
5. Other (specify \_\_\_\_\_)

### 30. To what extent do you agree with the following statements?

|                                                                                      | Completely disagree |   |   | Completely agree |   |  | I don't know |
|--------------------------------------------------------------------------------------|---------------------|---|---|------------------|---|--|--------------|
| 1. Structural protection works eliminate the possibility of serious damage           | 1                   | 2 | 3 | 4                | 5 |  | 0            |
| 2. Structural protection works are too expensive, compared to their benefits         | 1                   | 2 | 3 | 4                | 5 |  | 0            |
| 3. Structural protection works give a feeling of safety to people living in the area | 1                   | 2 | 3 | 4                | 5 |  | 0            |

## KNOWLEDGE

### 31. Knowledge about flood can come from various sources. To what extent did the following contribute to form your knowledge about floods?

|                                                                      | Not at all |   |   | Significant contribution |   |  | I don't know |
|----------------------------------------------------------------------|------------|---|---|--------------------------|---|--|--------------|
| 1. Direct experience                                                 | 1          | 2 | 3 | 4                        | 5 |  | 0            |
| 2. Knowledge and experienced passed on from relatives, friends, etc. | 1          | 2 | 3 | 4                        | 5 |  | 0            |
| 3. Official information                                              | 1          | 2 | 3 | 4                        | 5 |  | 0            |
| 4. Personal search                                                   | 1          | 2 | 3 | 4                        | 5 |  | 0            |

5. Other (specify \_\_\_\_\_)      1      2      3      4      5      0

**32. Do you know about other flood events that occurred in this region, or in neighbouring regions, in the last year?**

1. Yes (which? \_\_\_\_\_)  
2. No

**33. Did you participate in informative events on floods and flood risk in the last year?**

1. Yes (which? \_\_\_\_\_)  
2. No

### TRUST IN LOCAL ADMINISTRATION

**34. [On a scale from 1 (min) to 5 (max)] To what extent do you agree with the following statements?**

|                                                                                               | Completely disagree |   |   | Completely agree |   |  | I don't know |
|-----------------------------------------------------------------------------------------------|---------------------|---|---|------------------|---|--|--------------|
| 1. The local administration would inform me should flood risk in my area change significantly | 1                   | 2 | 3 | 4                | 5 |  | 0            |
| 2. I trust local administration when it comes to flood protection                             | 1                   | 2 | 3 | 4                | 5 |  | 0            |
| 3. The local administration has always been efficient when it comes to flood protection       | 1                   | 2 | 3 | 4                | 5 |  | 0            |

**35. In some cases, the public administrations provide support to adopt structural protection measures for private households. [On a scale from 1 (min) to 5 (max)] What support did your household receive from local, regional, or governmental administrations?**

|                                                                     | No support |   |   | Significant support |   |  | I don't know |
|---------------------------------------------------------------------|------------|---|---|---------------------|---|--|--------------|
| 1. Economical support to finance protection measures against floods | 1          | 2 | 3 | 4                   | 5 |  | 0            |
| 2. Material support (like sandbags or movable barriers)             | 1          | 2 | 3 | 4                   | 5 |  | 0            |
| 3. Information and awareness-raising                                | 1          | 2 | 3 | 4                   | 5 |  | 0            |

### SOCIO-DEMOGRAPHIC INDICATORS

**36. Year of birth** |\_\_|\_\_|\_\_|\_\_|

**37. Gender**

1. Male
2. Female
3. Other

**38. The home where you live is:**

1. Yours, your family's
2. Rented
3. Other (specify \_\_\_\_\_)

**39. Highest education achieved:**

1. Primary school
2. Lower secondary school
3. Upper secondary school (3 years)
4. Upper secondary school (5 years)
5. University degree

**40. [On a scale from 1 (min) to 5 (max)] To satisfy the needs of your household, your household income is:**

|              |   |   |   |   |                      |              |
|--------------|---|---|---|---|----------------------|--------------|
| Insufficient |   |   |   |   | More than sufficient | I don't know |
| 1            | 2 | 3 | 4 | 5 |                      | 0            |

**Do you agree to be contacted again to fill in this same survey in the future?**

1. Yes (contact – telephone nr/e-mail: \_\_\_\_\_)
2. No
