# Supplementary material for: Longitudinal survey data for diversifying temporal dynamics in flood risk modelling
Source: Copernicus journal article supplement (doi:10.5194/nhess-2021-88), 2021-03-31
Supplement: Supplementary file 2 [file nhess-2021-88-supplement.zip]

**Table S1. Results from the panel analysis conducted with Inversed Probability of Attrition Weights (IPAWs).**

| Variable                                       | Panel analysis with IPAWs |                                                                                                                                                                                                                                            |
|------------------------------------------------|---------------------------|--------------------------------------------------------------------------------------------------------------------------------------------------------------------------------------------------------------------------------------------|
|                                                | <i>Entire sample</i>      | <i>Significant interactions</i>                                                                                                                                                                                                            |
| <i>Risk awareness</i>                          |                           |                                                                                                                                                                                                                                            |
| General feeling of safety                      | No change                 | —                                                                                                                                                                                                                                          |
| Threat to self                                 | No change                 | —                                                                                                                                                                                                                                          |
| Threat to home                                 | No change                 | —                                                                                                                                                                                                                                          |
| Threat to town as a whole                      | No change                 | Gender ( <i>decreased for women, OR = .42, CI = .21–.83</i> )                                                                                                                                                                              |
| Expected future damage                         | No change                 | Damage ( <i>decreased for those who suffered high damage, OR = .19, CI = .05–.69</i> )                                                                                                                                                     |
| Local knowledge                                | No change                 | —                                                                                                                                                                                                                                          |
| Official information                           | Increased                 | Damage ( <i>increased for those who suffered high damage, OR = 4.80, CI = 1.74–13.21, and low damage, OR = 3.80, CI = 1.83–7.92</i> )                                                                                                      |
| Trust in administration for risk communication | Increased                 | Gender ( <i>increased for women, OR = 3.04, CI = 1.56–5.90</i> )<br>Damage ( <i>increased for those who suffered low damage, OR = 4.90, CI = 2.28–10.53</i> )<br>Age ( <i>increased for older respondents, OR = 1.03, CI = 1.00–1.05</i> ) |
| Trust in administration for protection works   | Increased                 | Damage ( <i>increased for respondents who suffered high damage, OR = 6.73, CI = 2.06–22.01, and low damage, OR = 6.37, CI = 2.89–14.04</i> )                                                                                               |
| <i>Preparedness</i>                            |                           |                                                                                                                                                                                                                                            |
| Individual preparedness                        | Increased                 | Damage ( <i>increased only for those who suffered no, OR = 5.28, CI = 2.28–12.21, or low damage, OR = 3.57, CI = 1.46–8.72</i> )                                                                                                           |
