# Supplementary material for: Longitudinal survey data for diversifying temporal dynamics in flood risk modelling
Source: Copernicus journal article supplement (doi:10.5194/nhess-2021-88), 2021-03-31
Supplement: Supplementary file 3 [file nhess-2021-88-supplement.zip]

## SENSO DI SICUREZZA

### 1. Da quanti anni vive a Negrar?

1. Dalla nascita (*passare alla domanda nr. 3*)
2. Dal \_\_\_\_\_ (aaaa)

### 2. Se non ha vissuto sempre a Negrar, dove viveva prima?

1. Altro comune della regione (specificare \_\_\_\_\_)
2. Altrove in Italia (specificare \_\_\_\_\_)
3. Altrove all'estero (specificare \_\_\_\_\_)
4. Altra frazione dello stesso comune

### 3. [Su una scala da 1 (min) a 5 (max)] In che misura vivere a Negrar la fa sentire sicuro?

| Minima sicurezza |   |   |   |   | Massima sicurezza | Non so |
|------------------|---|---|---|---|-------------------|--------|
| 1                | 2 | 3 | 4 | 5 |                   | 0      |

### 4. [Su una scala da 1 (min) a 5 (max)] Nell'elenco che segue, può indicare in che misura ritiene che ogni evento possa rappresentare un pericolo per lei personalmente o per la sua abitazione?

|                         | Per nulla |   |   |   | Pericolo serio | Non so |
|-------------------------|-----------|---|---|---|----------------|--------|
| 1. Terremoto            | 1         | 2 | 3 | 4 | 5              | 0      |
| 2. Attacco terroristico | 1         | 2 | 3 | 4 | 5              | 0      |
| 3. Furto                | 1         | 2 | 3 | 4 | 5              | 0      |
| 4. Siccità              | 1         | 2 | 3 | 4 | 5              | 0      |
| 5. Incendio             | 1         | 2 | 3 | 4 | 5              | 0      |

## VALUTAZIONE DEL RISCHIO

### 5. [Su una scala da 1 (min) a 5 (max)] Considerando le alluvioni, in che misura pensa che rappresentino un pericolo per

|                         | Per nulla |   |   |   | Pericolo serio | Non so |
|-------------------------|-----------|---|---|---|----------------|--------|
| 1. La sua casa          | 1         | 2 | 3 | 4 | 5              | 0      |
| 2. Lei personalmente    | 1         | 2 | 3 | 4 | 5              | 0      |
| 3. Il paese in cui vive | 1         | 2 | 3 | 4 | 5              | 0      |

### 6. [Su una scala da 1 (min) a 5 (max)] Che danni pensa che una potenziale futura alluvione possa causare alla sua abitazione?

| Nessun danno |   |   |   |   | Gravi danni | Non so |
|--------------|---|---|---|---|-------------|--------|
| 1            | 2 | 3 | 4 | 5 |             | 0      |

### 7. [In una scala da 1 (min) a 5 (max)] Com'è cambiata la sua consapevolezza del rischio generato da alluvioni rispetto ad un anno fa?

| Diminuita | Invariata |   |   | Aumentata | Non so |
|-----------|-----------|---|---|-----------|--------|
| 1         | 2         | 3 | 4 | 5         | 0      |

## ESPERIENZA PERSONALE

8. In passato, lei è già stato coinvolto da alluvioni o eventi simili qui o altrove?

1. Sì, nel |\_\_|\_\_|\_\_|\_\_| a \_\_\_\_\_
2. No

9. Nel settembre 2018 a Negrar un'alluvione... (breve descrizione evento). Lei si trovava qui quando l'evento si è verificato?

1. Sì
2. No (perché \_\_\_\_\_)

10. (Soltanto se già residenti durante l'evento del 2018) [Su una scala da 1 (min) a 5 (max)] Valuti la gravità dei danni subiti (da lei personalmente o dalla sua abitazione) a seguito dell'evento di settembre 2018:

|              |   |   |   |   |             |        |
|--------------|---|---|---|---|-------------|--------|
| Nessun danno |   |   |   |   | Gravi danni | Non so |
| 1            | 2 | 3 | 4 | 5 |             | 0      |

11. Se ha subito danni, che tipo di danni ha subito?

\_\_\_\_\_

12. Prima dell'evento di settembre 2018, pensava che un evento simile si potesse verificare qui?

1. Sì
2. No
3. Non so

13. Pensa che un evento simile possa verificarsi di nuovo qui in futuro?

1. Sì (perché \_\_\_\_\_)
2. No (perché \_\_\_\_\_)
3. Non so

## PREPARAZIONE INDIVIDUALE

14. [Su una scala da 1 (min) a 5 (max)] In che misura lei personalmente si sente preparato ad affrontare un fenomeno alluvionale, se si dovesse verificare in futuro?

|                     |   |   |   |   |                 |        |
|---------------------|---|---|---|---|-----------------|--------|
| Per nulla preparato |   |   |   |   | Molto preparato | Non so |
| 1                   | 2 | 3 | 4 | 5 |                 | 0      |

15. [In una scala da 1 (min) a 5 (max)] Com'è cambiata la sua preparazione ad affrontare le alluvioni rispetto ad un anno fa?

|           |   |   |           |   |           |        |
|-----------|---|---|-----------|---|-----------|--------|
| Diminuita |   |   | Invariata |   | Aumentata | Non so |
| 1         | 2 | 3 | 4         | 5 |           | 0      |

16. Ha adottato misure di protezione strutturali (quali ad esempio paratie mobili, valvole antiriflusso, etc.) per il suo nucleo abitativo? [Nel caso ne abbiano adottate sia prima che dopo, barrare la 1 e mettere una nota a fianco]

1. Sì, prima dell'evento di settembre 2018 (quali \_\_\_\_\_)
2. Sì, dopo l'evento di settembre 2018 (quali \_\_\_\_\_)
3. No

**17. (Soltanto se ha risposto “No” alla domanda nr 16) Perché non ha adottato misure strutturali per proteggere il suo nucleo abitativo da eventi alluvionali? [max 2 risposte]**

1. Non ne ho bisogno/vivo in una zona sicura
2. Non ne conoscevo l'esistenza
3. Ero interessato/a ma il costo è inaccessibile
4. Questi eventi accadono raramente e quindi non otterrei beneficio da queste misure. Sarebbe solo un costo.
5. Non so a chi rivolgermi per installare le misure strutturali
6. La protezione dalle catastrofi naturali è una responsabilità delle autorità locali, non dei cittadini
7. Non mi interessa
8. Altro

**18. (Soltanto se ha risposto “No” alla domanda nr 16) Ha intenzione di adottarne in futuro?**

1. Sì
2. No
3. Non so

**19. (Soltanto se ha risposto “Sì” alla nr 16 o “Sì” alla nr 18) Qual è stata/Qual è la principale motivazione per adottare le misure strutturali?**

1. Perché me l'hanno suggerito (amici, parenti, amministrazione comunale) etc.
2. Perché temo/temevo il verificarsi di un'alluvione
3. Perché temo/temevo danni materiali al mio nucleo abitativo
4. Altro (specificare \_\_\_\_\_)

**20. (Soltanto se ha risposto “Sì” alla nr 16 o “Sì” alla nr 18) [Su una scala da 1 (min) a 5 (max)] Per quanto riguarda le misure strutturali, specificare:**

|                                                                    |                    |   |   |   |                |        |
|--------------------------------------------------------------------|--------------------|---|---|---|----------------|--------|
|                                                                    | Per nulla efficaci |   |   |   | Molto efficaci | Non so |
| Quanto crede siano efficaci a ridurre eventuali danni da alluvioni | 1                  | 2 | 3 | 4 | 5              | 0      |

|                         |             |   |   |   |            |        |
|-------------------------|-------------|---|---|---|------------|--------|
|                         | Molto Basso |   |   |   | Molto alto | Non so |
| Come ne valuta il costo | 1           | 2 | 3 | 4 | 5          | 0      |

**21. Ha assicurato la sua abitazione contro le alluvioni?**

1. Sì, prima dell'evento di settembre 2018
2. Sì, dopo l'evento di settembre 2018
3. No
4. Non so

**22. (Soltanto se ha risposto “No” alla domanda nr 21) Perché non ha assicurato la sua abitazione da eventi alluvionali? [max 2 risposte]**

1. Non ne ho bisogno/vivo in una zona sicura
2. Non ne conoscevo l'esistenza
3. Ero interessato/a, ma il costo è inaccessibile
4. Questi eventi accadono raramente e quindi non otterrei beneficio. Sarebbe solo un costo.
5. Non è una mia responsabilità (ma ad es. del proprietario)
6. La protezione dalle catastrofi naturali è una responsabilità delle autorità locali, non dei cittadini
7. Non mi interessa
8. Altro

**23.** (Soltanto se ha risposto “No” alla nr 21) **Ha intenzione di stipulare un’assicurazione in futuro?**

1. Sì
2. No
3. Non so

**24.** (Soltanto se ha risposto “Sì” alla nr 21 o “Sì” alla nr 23) **Perché ha intenzione/ha deciso di stipulare un’assicurazione?** [barrare tutte le risposte che danno]

1. Perché me l’hanno suggerito (amici, parenti, amministrazione comunale) etc.
2. Perché temo/temevo il verificarsi di un’alluvione
3. Perché temo/temevo danni materiali al mio nucleo abitativo
4. Altro (specificare \_\_\_\_\_)

**25.** [Su una scala da 1 (min) a 5 (max)] **Riguardo all’assicurazione, specificare:**

|                                                                   |                    |   |   |   |                |        |
|-------------------------------------------------------------------|--------------------|---|---|---|----------------|--------|
|                                                                   | Per nulla efficace |   |   |   | Molto efficace | Non so |
| Quanto crede sia efficace a mitigare eventuali danni da alluvioni | 1                  | 2 | 3 | 4 | 5              | 0      |

|                         |             |   |   |   |            |        |
|-------------------------|-------------|---|---|---|------------|--------|
|                         | Molto Basso |   |   |   | Molto alto | Non so |
| Come ne valuta il costo | 1           | 2 | 3 | 4 | 5          | 0      |

**26.** **Ci sono diverse misure per limitare e prevenire i danni generati da possibili alluvioni. Secondo lei, che cosa sarebbe più urgente fare qui a Negrar?** [max 2 risposte]

1. Costruire nuove opere di protezione, come canali di diversione, etc.
2. Garantire una migliore manutenzione dei progni
3. Gestire diversamente il territorio (specificare \_\_\_\_\_)
4. Migliorare il sistema di allertamento (ad es. comunicazione più efficace in caso di alluvione)
5. Migliorare la preparazione delle persone che vivono in zone a rischio (attraverso esercitazioni, corsi, etc.)
6. Altro (specificare \_\_\_\_\_)

## OPERE DI PROTEZIONE

**27.** **È a conoscenza di infrastrutture o interventi in questa zona (Negrar o dintorni) per ridurre possibili danni derivanti da alluvioni?**

1. Sì (quali \_\_\_\_\_)
2. No

**28.** **È a conoscenza di questa infrastruttura che è al momento in costruzione?** [mostrare fotografia dei lavori]

1. Sì
2. No (passare alla domanda nr. 30)

**29.** (Soltanto se ha risposto “Sì” alla nr 28) **Come ne è venuto a conoscenza?**

1. Da solo
2. Da amici e conoscenti
3. Dalle amministrazioni locali
4. Dai giornali
5. Altro (specificare \_\_\_\_\_)

**30. Indichi in che misura è d'accordo con le seguenti affermazioni?** [Su una scala da 1 (min) a 5 (max)]

|                                                                                               | Per nulla<br>d'accordo |   |   | Totalmente<br>d'accordo |   | Non so |
|-----------------------------------------------------------------------------------------------|------------------------|---|---|-------------------------|---|--------|
| 1. Le opere di protezione/interventi eliminano la possibilità di danni gravi                  | 1                      | 2 | 3 | 4                       | 5 | 0      |
| 2. Le opere di protezione/interventi sono troppo costose rispetto ai benefici                 | 1                      | 2 | 3 | 4                       | 5 | 0      |
| 3. Le opere di protezione/interventi danno un senso di sicurezza alla gente che vive in paese | 1                      | 2 | 3 | 4                       | 5 | 0      |

## CONOSCENZE

**31. Le conoscenze sulle alluvioni si possono formare in tanti modi.** [In una scala da 1 (min) a 5 (max)] **Indichi in che misura le seguenti modalità hanno contribuito a formare le sue conoscenze in merito.**

|                                                                           | Nulla |   |   | Massima |   | Non so |
|---------------------------------------------------------------------------|-------|---|---|---------|---|--------|
| 1. Esperienza diretta                                                     | 1     | 2 | 3 | 4       | 5 | 0      |
| 2. Esperienza e conoscenza tramandata (da genitori, nonni, parenti, ecc.) | 1     | 2 | 3 | 4       | 5 | 0      |
| 3. Iniziative ufficiali d'informazione                                    | 1     | 2 | 3 | 4       | 5 | 0      |
| 4. Ricerca personale di informazioni                                      | 1     | 2 | 3 | 4       | 5 | 0      |
| 5. Altro (specificare _____)                                              | 1     | 2 | 3 | 4       | 5 | 0      |

**32. È a conoscenza di altri eventi alluvionali accaduti in Veneto o regioni limitrofe nell'ultimo anno?**

1. Sì (quali \_\_\_\_\_)
2. No

**33. Ha partecipato a serate informative o eventi a tema alluvioni/rischio alluvionale nell'ultimo anno?**

1. Sì (quali \_\_\_\_\_)
2. No

## FIDUCIA NELLE AMMINISTRAZIONI

**34. [Su una scala da 1 (min) a 5 (max)] Indichi in che misura è d'accordo con le seguenti affermazioni.**

|                                                                                                                        | Per nulla<br>d'accordo |   |   | Totalmente<br>d'accordo |   | Non so |
|------------------------------------------------------------------------------------------------------------------------|------------------------|---|---|-------------------------|---|--------|
| 1. Se il rischio da alluvioni nella mia zona cambiasse significativamente le amministrazioni locali mi informerebbero. | 1                      | 2 | 3 | 4                       | 5 | 0      |
| 2. Mi fido delle amministrazioni locali per quanto riguarda la protezione da alluvioni.                                | 1                      | 2 | 3 | 4                       | 5 | 0      |
| 3. Le amministrazioni locali sono sempre state efficienti per quanto riguarda la protezione da alluvioni.              | 1                      | 2 | 3 | 4                       | 5 | 0      |

**35. In certi casi, le amministrazioni pubbliche offrono supporto per l'adozione di misure per la riduzione del rischio di nuclei abitativi privati. [Su una scala da 1 (min) a 5 (max)] Che tipo di supporto ha ricevuto il suo nucleo abitativo dalle amministrazioni locali, regionali, o statali?**

|                                                                                                  | Supporto minimo |   |   | Supporto massimo |   | Non so |
|--------------------------------------------------------------------------------------------------|-----------------|---|---|------------------|---|--------|
| 1. Supporto economico per finanziare misure di precauzione contro le alluvioni (sussidi)         | 1               | 2 | 3 | 4                | 5 | 0      |
| 2. Supporto materiale (come distribuzione di sacchi di sabbia o altre barriere mobili)           | 1               | 2 | 3 | 4                | 5 | 0      |
| 3. Informazioni e sensibilizzazione (esercitazioni, campagne di comunicazione del rischio, ecc.) | 1               | 2 | 3 | 4                | 5 | 0      |

#### VARIANTI SOCIO-DEMOGRAFICHE

**36. Anno di nascita** |\_\_|\_\_|\_\_|\_\_|

**37. Genere**

1. Uomo
2. Donna
3. Altro

**38. L'abitazione in cui vive è:**

1. Sua/della sua famiglia
2. In affitto
3. Altro (specificare \_\_\_\_\_)

**39. Massimo livello di istruzione raggiunto:**

1. Scuola elementare
2. Scuola media
3. Diploma professionale (3 anni)
4. Diploma (5 anni)
5. Laurea/dottorato

**40. [Su una scala da 1 (min) a 5 (max)] Per soddisfare i bisogni del suo nucleo abitativo, il suo reddito è:**

| Insufficiente |   |   |   | Più che sufficiente |   | Non so |
|---------------|---|---|---|---------------------|---|--------|
| 1             | 2 | 3 | 4 | 5                   | 0 |        |

**È disponibile a partecipare nuovamente a questo sondaggio in futuro?**

1. Sì (contatto – telefono/e-mail: \_\_\_\_\_)
2. No
