# Supplementary material for: Longitudinal survey data for diversifying temporal dynamics in flood risk modelling
Source: Copernicus journal article supplement (doi:10.5194/nhess-2021-88), 2021-03-31
Supplement: Supplementary file 4 [file nhess-2021-88-supplement.zip]

## FEELING OF SAFETY

### 1. How long have you been living in Negrar?

1. From birth (*jump to question nr. 3*)
2. From \_\_\_\_\_ (yyyy)

### 2. If you haven't always lived here, where did you live before?

1. Another municipality in the same region (specify \_\_\_\_\_)
2. Somewhere else in Italy (specify \_\_\_\_\_)
3. Somewhere else abroad (specify \_\_\_\_\_)
4. Another *frazione* in the same municipality

### 3. [On a scale from 1 (min) to 5 (max)] To what extent living in Negrar make you feel safe?

| Minimum safety |   |   |   |   | Maximum safety | I don't know |
|----------------|---|---|---|---|----------------|--------------|
| 1              | 2 | 3 | 4 | 5 |                | 0            |

### 4. [On a scale from 1 (min) to 5 (max)] In the following list, could you indicate to what extent each of these events could pose a threat for you or your household?

|                  | Not at all |   |   |   | Severe threat | I don't know |
|------------------|------------|---|---|---|---------------|--------------|
| 1. Earthquake    | 1          | 2 | 3 | 4 | 5             | 0            |
| 2. Terror attack | 1          | 2 | 3 | 4 | 5             | 0            |
| 3. Robbery       | 1          | 2 | 3 | 4 | 5             | 0            |
| 4. Drought       | 1          | 2 | 3 | 4 | 5             | 0            |
| 5. Fire          | 1          | 2 | 3 | 4 | 5             | 0            |

## RISK ASSESSMENT

### 5. [On a scale from 1 (min) to 5 (max)] Considering floods, to what extent do you think they pose a threat to

|                        | Not at all |   |   |   | Severe threat | I don't know |
|------------------------|------------|---|---|---|---------------|--------------|
| 1. Your home           | 1          | 2 | 3 | 4 | 5             | 0            |
| 2. You personally      | 1          | 2 | 3 | 4 | 5             | 0            |
| 3. The town as a whole | 1          | 2 | 3 | 4 | 5             | 0            |

### 6. [On a scale from 1 (min) to 5 (max)] How much damage do you think a potential future flood could cause to your home?

| No damage |   |   |   |   | Severe damage | I don't know |
|-----------|---|---|---|---|---------------|--------------|
| 1         | 2 | 3 | 4 | 5 |               | 0            |

### 7. [On a scale from 1 (min) to 5 (max)] How did your flood risk awareness change, compared to one year ago?

| Decreased | Unchanged |   |   |   | Increased | I don't know |
|-----------|-----------|---|---|---|-----------|--------------|
| 1         | 2         | 3 | 4 | 5 |           | 0            |

## PERSONAL EXPERIENCE

8. Have you ever been involved, in the past, in floods or similar events here or elsewhere?

1. Yes, in |\_\_|\_\_|\_\_|\_\_| in (location) \_\_\_\_\_
2. No

9. In September 2018 a flood hit Negrar. Were you here when the event occurred?

1. Yes
2. No (because \_\_\_\_\_)

10. (Only if already residing in Negrar in September 2018) [On a scale from 1 (min) to 5 (max)] Please assess the severity of the damage suffered by you or your home following the 2018 event:

|           |   |   |   |   |               |              |
|-----------|---|---|---|---|---------------|--------------|
| No damage |   |   |   |   | Severe damage | I don't know |
| 1         | 2 | 3 | 4 | 5 |               | 0            |

11. If you suffered damages, what kind?

\_\_\_\_\_

12. Did you think something like this could occur here, before the 2018 event?

1. Yes
2. No
3. I don't know

13. Do you think a similar event could occur again here in the future?

1. Yes (because \_\_\_\_\_)
2. No (because \_\_\_\_\_)
3. I don't know

## INDIVIDUAL PREPAREDNESS

14. [On a scale from 1 (min) to 5 (max)] To what extent do you feel prepared to face a flood event, should it occur again?

|                     |   |   |   |   |                 |              |
|---------------------|---|---|---|---|-----------------|--------------|
| Not at all prepared |   |   |   |   | Highly prepared | I don't know |
| 1                   | 2 | 3 | 4 | 5 |                 | 0            |

15. [On a scale from 1 (min) to 5 (max)] How did your preparedness to face a flood event changed, compared to one year ago?

|           |   |   |           |   |           |              |
|-----------|---|---|-----------|---|-----------|--------------|
| Decreased |   |   | Unchanged |   | Increased | I don't know |
| 1         | 2 | 3 | 4         | 5 |           | 0            |

16. Did you adopt any structural protection measure (e.g. movable bulkheads, valves, etc.) for your household? [In case they adopted them before and after, cross 1 and write a note on the side]

1. Yes, before the 2018 event (which? \_\_\_\_\_)
2. Yes, after the 2018 event (which? \_\_\_\_\_)
3. No

**17.** (Only if they replied “No” to question nr 16) **Why didn’t you adopted any structural protection measure to protect your household from floods?** [max 2 answers]

1. I don’t need them/I live in a safe area
2. I didn’t know about them
3. I was interesred, but they are too expensive
4. These events are rare so it would be more a cost than a benefit
5. I don’t know who to contact to install them
6. Protection from natural hazards is the local authorities’ responsibility
7. I’m not interested
8. Other

**18.** (Only if they replied “No” to question 16) **Do you intend to adopt any in the future?**

1. Yes
2. No
3. I don’t know

**19.** (Only if they replied “Yes” to question nr 16 or “Yes” to nr 18) **Which was/is the main reason you wan to adopt structural protection measures?**

1. Because it was recommended by friends, relatives, or the local administration
2. Because I fear the occurrence of a flood
3. Because I fear damages to my household
4. Other (specify \_\_\_\_\_)

**20.** (Only if they replied “Yes” to question nr 16 or “Yes” to nr 18) [On a scale from 1 (min) to 5 (max)]  
**Concerning structural protection measures:**

|                                                                     |                      |   |   |   |   |                |   |              |
|---------------------------------------------------------------------|----------------------|---|---|---|---|----------------|---|--------------|
|                                                                     | Not at all effective |   |   |   |   | Very effective |   | I don’t know |
| How effective do you think they are in reducing damage from floods? | 1                    | 2 | 3 | 4 | 5 |                | 0 |              |

|                               |          |   |   |   |           |  |              |
|-------------------------------|----------|---|---|---|-----------|--|--------------|
|                               | Very low |   |   |   | Very high |  | I don’t know |
| How do you assess their cost? | 1        | 2 | 3 | 4 | 5         |  | 0            |

**21. Did you insure your house against floods?**

1. Yes, before the 2018 event
2. Yes, after the 2018 event
3. No
4. I don’t know

**22.** (Only if they replied “No” to question nr 21) **Why didn’t you insure your house against floods?** [max 2 answers]

1. I don’t need it/I live in a safe area
2. I didn’t know about it
3. I was interesred, but it’s too expensive
4. These events are rare so it would be more a cost than a benefit
5. It is not my responsibility, but the landlord’s
6. Protection from natural hazards is the local authorities’ responsibility
7. I’m not interested
8. Other

**23.** (Only if they replied “No” to question nr 21) **Do you intend to insure your house in the future?**

1. Yes
2. No
3. I don't know

**24.** (Only if they replied “Yes” to question nr 21 or “Yes” to nr 23) **Why do you intend to insure your house against floods?**

1. Because it was recommended by friends, relatives, or the local administration
2. Because I fear the occurrence of a flood
3. Because I fear damages to my household
4. Other (specify \_\_\_\_\_)

**25.** [On a scale from 1 (min) to 5 (max)] **Concerning insurance:**

|                                                                  |                      |   |                |   |              |   |
|------------------------------------------------------------------|----------------------|---|----------------|---|--------------|---|
|                                                                  | Not at all effective |   | Very effective |   | I don't know |   |
|                                                                  | 1                    | 2 | 3              | 4 | 5            | 0 |
| How effective do you think it is in reducing damage from floods? |                      |   |                |   |              |   |

|                             |          |   |           |   |              |   |
|-----------------------------|----------|---|-----------|---|--------------|---|
|                             | Very low |   | Very high |   | I don't know |   |
|                             | 1        | 2 | 3         | 4 | 5            | 0 |
| How do you assess its cost? |          |   |           |   |              |   |

**26.** **there are various measures to reduce and prevent damage caused by floods. According to you, what are the most urgent ones to adopt here in Negrar?** [max 2 answer]

1. Building new structural protection works
2. A better maintenance of the local streams
3. A different land management (specify \_\_\_\_\_)
4. Improve early warning systems
5. Improve the preparedness of people living in the town
6. Other (specify \_\_\_\_\_)

## STRUCTURAL PROTECTION WORKS

**27.** **Do you know any structural protection works in this area, aimed at reducing flood risk?**

1. Yes (which? \_\_\_\_\_)
2. No

**28.** **Do you know about this structural protection works?** [show picture of construction site]

1. Yes
2. No (jump to question nr. 30)

**29.** (Only if they replied “Yes” to question nr 28) **How did you come to know it?**

1. On my own
2. Via friends or relatives
3. Via the local administration
4. Via newspapers
5. Other (specify \_\_\_\_\_)

**30.** **To what extent do you agree with the following statements?**

|                                                                                      | Completely disagree |   |   | Completely agree |   |  | I don't know |
|--------------------------------------------------------------------------------------|---------------------|---|---|------------------|---|--|--------------|
| 1. Structural protection works eliminate the possibility of serious damage           | 1                   | 2 | 3 | 4                | 5 |  | 0            |
| 2. Structural protection works are too expensive, compared to their benefits         | 1                   | 2 | 3 | 4                | 5 |  | 0            |
| 3. Structural protection works give a feeling of safety to people living in the area | 1                   | 2 | 3 | 4                | 5 |  | 0            |

## KNOWLEDGE

**31. Knowledge about flood can come from various sources. To what extent did the following contribute to form your knowledge about floods?**

|                                                                      | Not at all |   |   | Significant contribution |   |  | I don't know |
|----------------------------------------------------------------------|------------|---|---|--------------------------|---|--|--------------|
| 1. Direct experience                                                 | 1          | 2 | 3 | 4                        | 5 |  | 0            |
| 2. Knowledge and experienced passed on from relatives, friends, etc. | 1          | 2 | 3 | 4                        | 5 |  | 0            |
| 3. Official information                                              | 1          | 2 | 3 | 4                        | 5 |  | 0            |
| 4. Personal search                                                   | 1          | 2 | 3 | 4                        | 5 |  | 0            |
| 5. Other (specify _____)                                             | 1          | 2 | 3 | 4                        | 5 |  | 0            |

**32. Do you know about other flood events that occurred in this region, or in neighbouring regions, in the last year?**

1. Yes (which? \_\_\_\_\_)
2. No

**33. Did you participate in informative events on floods and flood risk in the last year?**

1. Yes (which? \_\_\_\_\_)
2. No

## TRUST IN LOCAL ADMINISTRATION

**34. [On a scale from 1 (min) to 5 (max)] To what extent do you agree with the following statements?**

|                                                                                               | Completely disagree |   |   | Completely agree |   |  | I don't know |
|-----------------------------------------------------------------------------------------------|---------------------|---|---|------------------|---|--|--------------|
| 1. The local administration would inform me should flood risk in my area change significantly | 1                   | 2 | 3 | 4                | 5 |  | 0            |
| 2. I trust local administration when it comes to flood protection                             | 1                   | 2 | 3 | 4                | 5 |  | 0            |
| 3. The local administration has always been efficient when it comes to flood protection       | 1                   | 2 | 3 | 4                | 5 |  | 0            |

**35. In some cases, the public administrations provide support to adopt structural protection measures for private households. [On a scale from 1 (min) to 5 (max)] What support did your household receive from local, regional, or governmental administrations?**

|                                                                     | No support |   |   | Significant support |   | I don't know |
|---------------------------------------------------------------------|------------|---|---|---------------------|---|--------------|
| 1. Economical support to finance protection measures against floods | 1          | 2 | 3 | 4                   | 5 | 0            |
| 2. Material support (like sandbags or movable barriers)             | 1          | 2 | 3 | 4                   | 5 | 0            |
| 3. Information and awareness-raising                                | 1          | 2 | 3 | 4                   | 5 | 0            |

#### SOCIO-DEMOGRAPHIC INDICATORS

**36. Year of birth** |\_\_|\_\_|\_\_|\_\_|

**37. Gender**

1. Male
2. Female
3. Other

**38. The home where you live is:**

1. Yours, your family's
2. Rented
3. Other (specifyf \_\_\_\_\_)

**39. Highest education achieved:**

1. Primary school
2. Lower secondary school
3. Upper secondary school (3 years)
4. Upper secondary school (5 years)
5. University degree

**40. [On a scale from 1 (min) to 5 (max)] To satisfy the needs of your household, your household income is:**

| Insufficient |   |   |   |   | More than sufficient | I don't know |
|--------------|---|---|---|---|----------------------|--------------|
| 1            | 2 | 3 | 4 | 5 |                      | 0            |

**Do you agree to be contacted again to fill in this same survey in the future?**

1. Yes (contact – telephone nr/e-mail: \_\_\_\_\_)
2. No
